# Supplementary material
Source: publisher figshare collection journal article supplement (https://acs.figshare.com/ndownloader/files/4007308)
Supplement: Supplementary file 1 [file 4007308]

# Surface Chemical Modification of Poly(dimethylsiloxane) for Enhanced Adhesion and Proliferation of Mesenchymal Stem Cells

*Shreyas Kuddannaya<sup>†§</sup>, Yon Jin Chuah<sup>‡§</sup>, Min Hui Adeline Lee<sup>‡</sup>, Nishanth V. Menon<sup>‡</sup>, Yuejun Kang<sup>\*‡</sup>, Yilei Zhang<sup>\*†</sup>*

<sup>§</sup>These authors contributed equally to this work.

<sup>†</sup>School of Mechanical & Aerospace Engineering, Nanyang Technological University, 50 Nanyang Avenue, Singapore 639798, Singapore

<sup>‡</sup>School of Chemical and Biomedical Engineering, Nanyang Technological University, 62 Nanyang Drive, Singapore 637459, Singapore

## **Corresponding Author**

\*E-mail: yuejun.kang@ntu.edu.sg (Y.K.); ylzhang@ntu.edu.sg (Y.Z.). Phone: +65 6790 5952.

Fax: +65 6794 2035.

## Supporting Information.

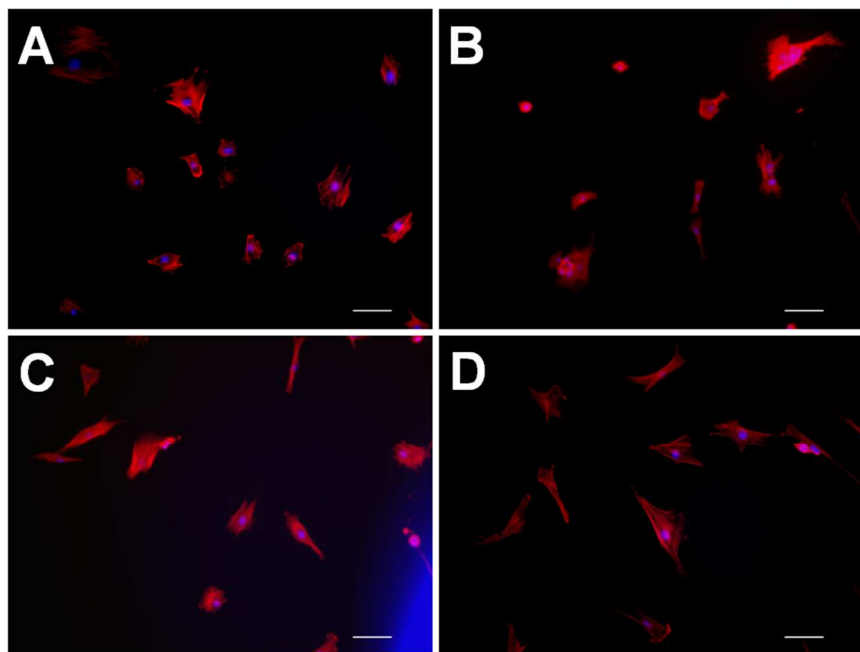

Figure S1. Mesenchymal Stem Cells spreading on (A) Tissue Culture Plate, (B) PDMS surface with collagen type 1 (C1) adsorption, (C) Chemically modified PDMS surface with APTES+C1 and (D) Chemically modified PDMS surface with APTES+GA+C1. (scale bar = 50  $\mu\text{m}$ )

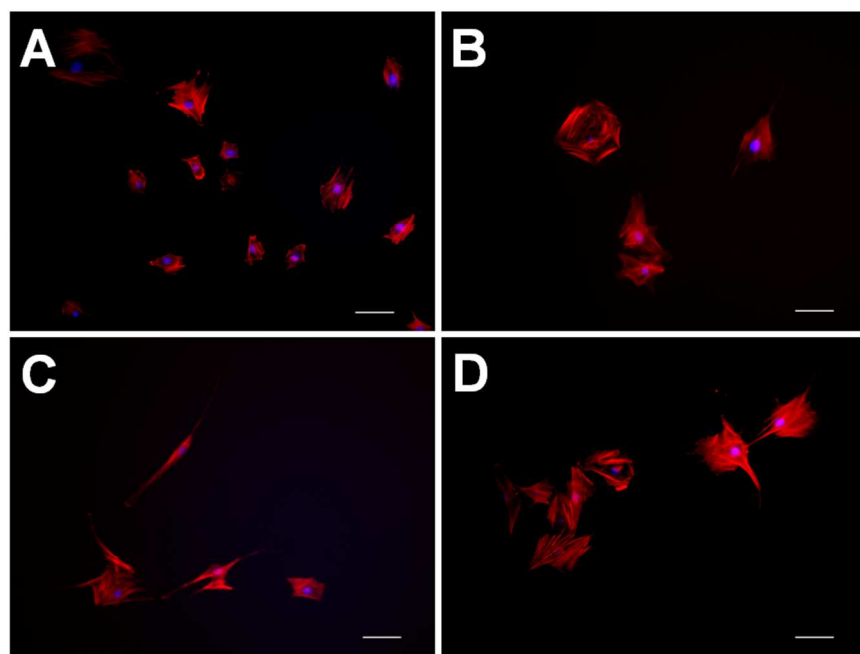

Figure S2. Mesenchymal Stem Cells spreading on (A) Tissue Culture Plate, (B) PDMS surface with fibronectin (FN) adsorption, (C) Chemically modified PDMS surface with APTES+FN and (D) Chemically modified PDMS surface with APTES+GA+FN. (scale bar = 50  $\mu\text{m}$ )
